# Supplementary material
Source: publisher figshare collection journal article supplement (https://acs.figshare.com/ndownloader/files/9860959)
Supplement: Supplementary file 1 [file 9860959]

## Supporting Information

# Lipid Pore-Filled Silica Thin Film Membranes for Biomimetic Recovery of Dilute Carbohydrate

*Shanshan Zhou, Daniel M. Schlipf, Emma Guilfoil, Stephen E. Rankin, Barbara L.*

*Knutson\**

Department of Chemical and Materials Engineering, University of Kentucky

177 F. Paul Anderson Tower, Lexington KY 40506-0046

\*Corresponding author: [bknut2@uky.edu](mailto:bknut2@uky.edu); tel: 859-257-5715; fax: 859-323-1929

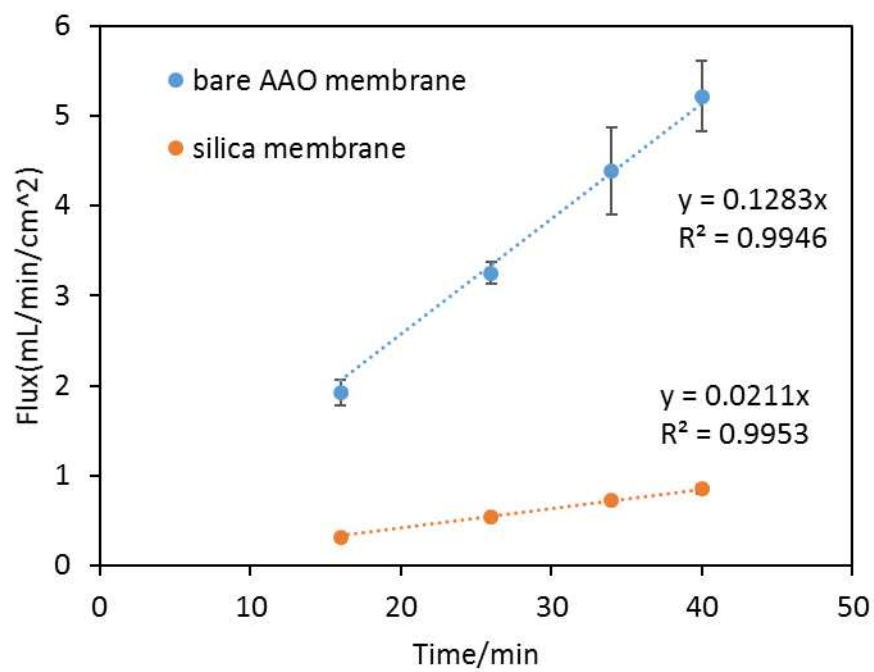

**Figure S1.** Ethanol flux as a function of pressure drop.

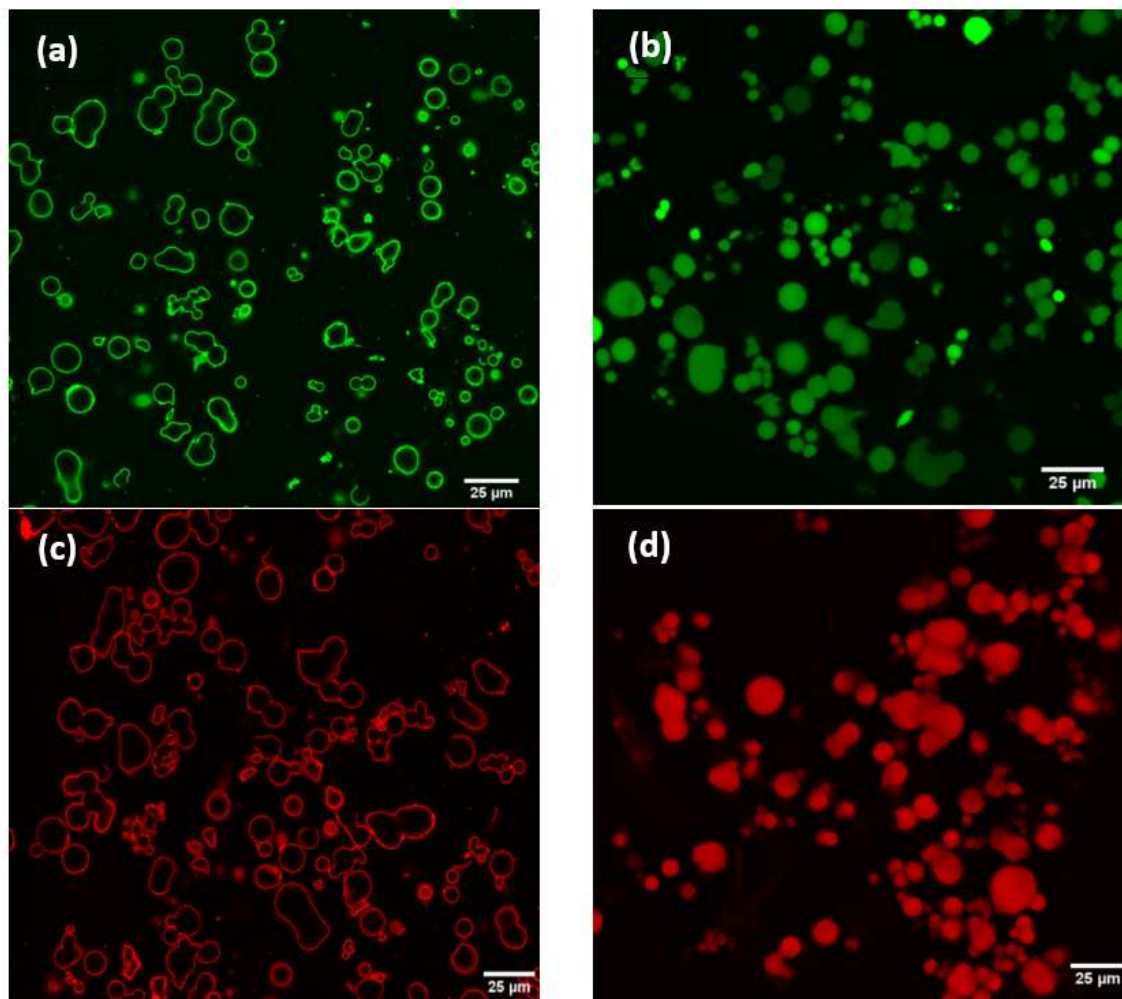

**Figure S2:** Confocal microscopy images of (a) lipid enveloped silica particle; (b) lipid filled silica particles; (c) lipid-BA enveloped silica particle; (d) lipid-BA filled silica particles. Lipid is tagged with green fluorescent DiO and boronic acid (BAMP-BA) is complexed with ARS to give red fluorescence.

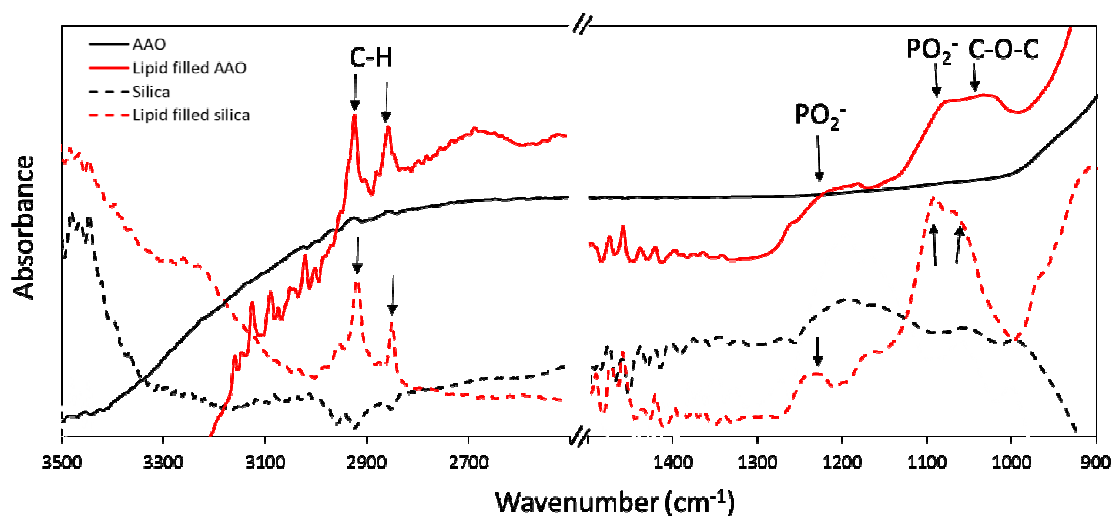

**Figure S3.** ATR-FTIR spectra of bare AAO, silica, lipid filled AAO and lipid filled silica membrane.

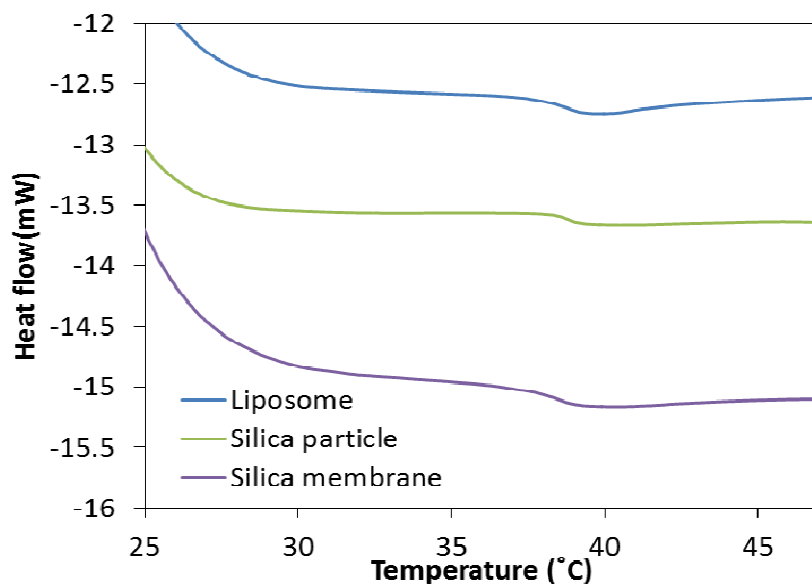

**Figure S4.** Gel to fluid phase behavior of BAMP-BA immobilized liposome, lipid-filled silica particles and lipid-filled silica membrane as measured by DSC (59 mol% BAMP-BA).
